# Supplementary material for: CRISPR/Cas9-mediated genome editing in wild-derived mice: generation of tamed wild-derived strains by mutation of the a (nonagouti) gene
Source: PubMed Central journal article supplement (PMC5307340; doi:10.1038/srep42476), 2017-02-14
Supplement: srep42476-s1.pdf [file srep42476-s1.pdf]

## **Supplementary Information**

**CRISPR/Cas9-mediated genome editing in wild-derived mice: generation of tamed wild-derived strains by mutation of the *a* (*nonagouti*) gene**

**Michiko Hirose, Ayumi Hasegawa, Keiji Mochida, Shogo Matoba, Yuki Hatanaka, Kimiko Inoue, Tatsuhiko Goto, Hideki Kaneda, Ikuko Yamada, Tamio Furuse, Kuniya Abe, Yoshihisa Uenoyama, Hiroko Tsukamura, Shigeharu Wakana, Arata Honda, Atsuo Ogura**

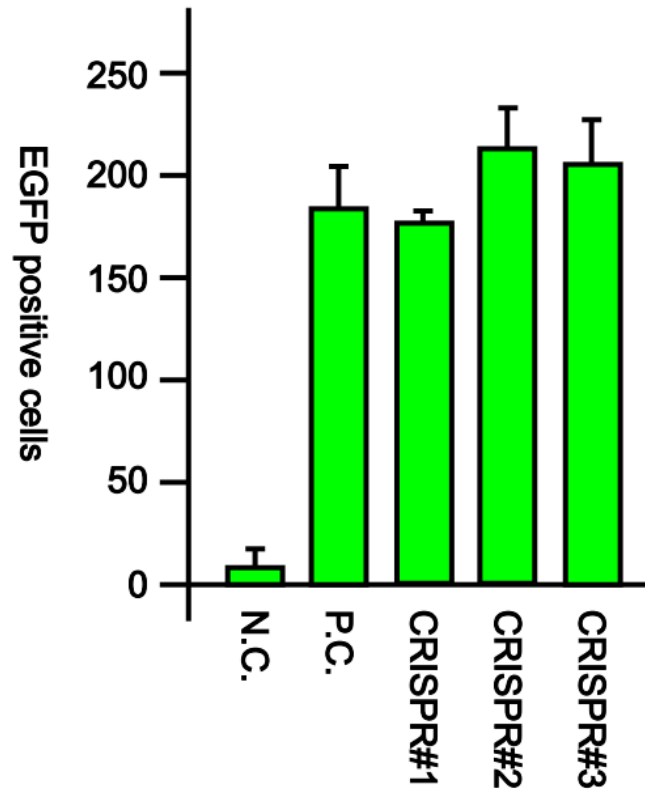

**Figure S1. Evaluation of sgRNA sequences for disrupting the *a* (*nonagouti*) gene. Quantitative representation of the DSB efficiency of each sgRNA sequence. Data are shown as the mean  $\pm$ S.D. N.C., normal control pX330 without an sgRNA sequence; P.C., positive control pX330 with a *Cetn1* sgRNS sequence<sup>16</sup>; CRISPR #1-CRISPR#3, pX330 plasmid with a (*nonagouti*) target sequences, respectively.**

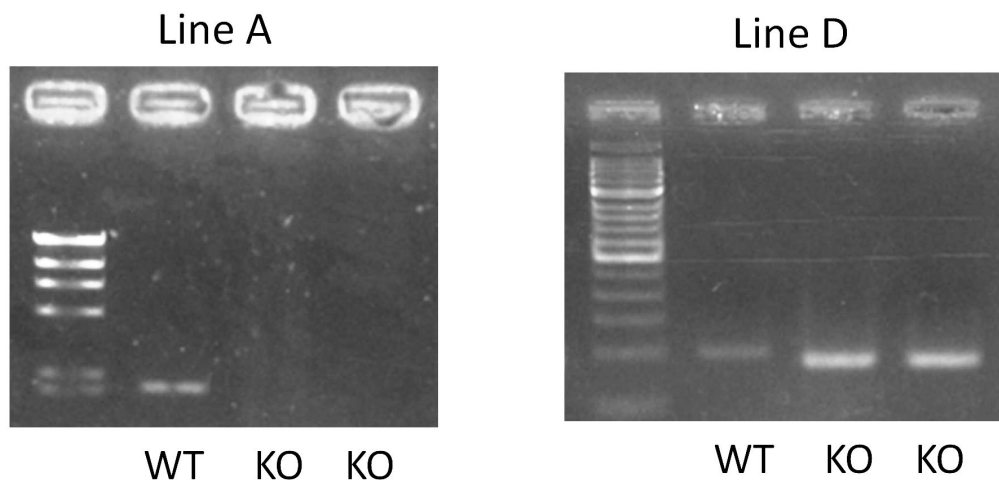

**Figure S2. Genomic PCR analysis for identification of mutations in Lines A and D. In Line A, the mutation can be detected by the loss of the PCR product amplified with a primer pair designed for the target site. In Line D, the mutation is identified based on the length of the PCR product that covers the entire the deleted region. The PCR product of Line D mice is 11 bp shorter than that of wild type mice (see Fig. 1C). WT, wild type; KO, knockout.**

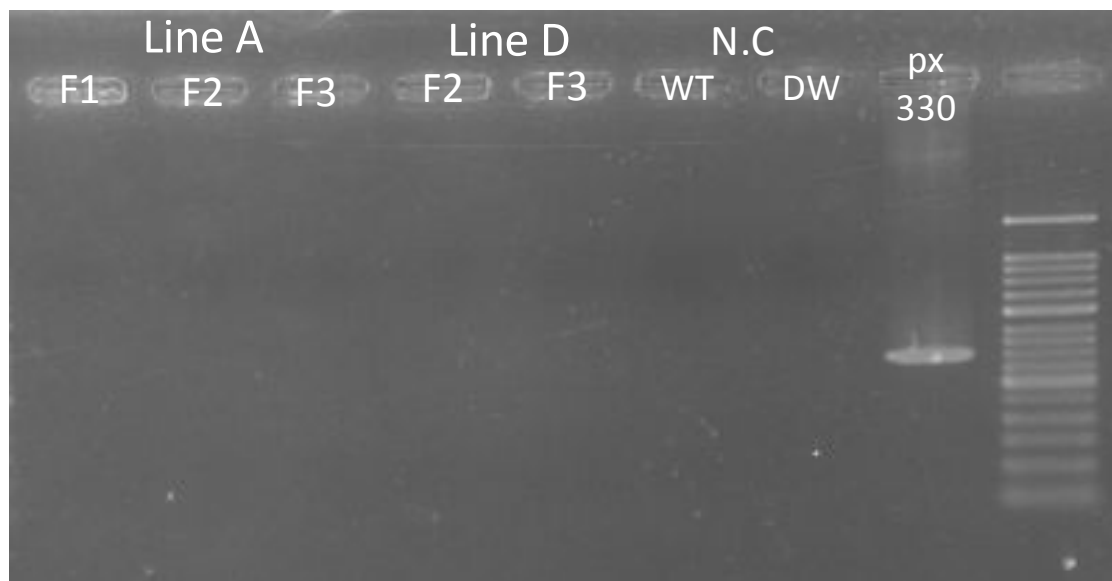

**Figure S3. Genomic PCR analysis for detection of the plasmid sequence (Cas9 region) in KO mice from Lines A and D at the F1 to F3 generations. No integration of the plasmid was found in all the mice analyzed. N.C., negative control; WT, wild type; DW, distilled water; px330; the original vector containing Cas9 sequence.**

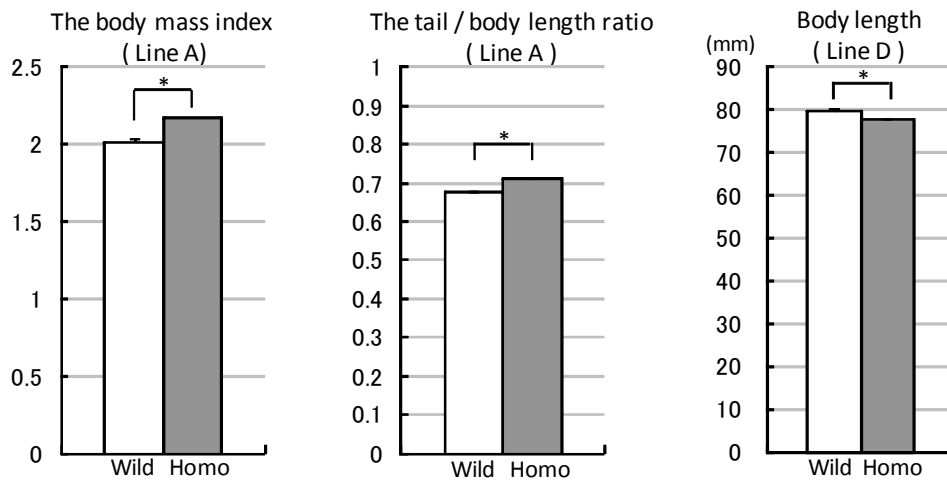

**Figure S4. The SHIRPA parameters that showed significant differences between wild-type (WT) and nonagouti homozygous knockout (KO) mice in lines A or D: the body mass index and the tail/body length ratio in line A and body length in line D ( $P < 0.05$ ). No significant differences were found for other parameters. The data were analysed by two-way ANOVA analysis (sex  $\times$  genotype) followed by Tukey multiple comparisons. Data are presented as the mean  $\pm$  S.E.M.**

a

| General parameter                    | Adipocytokine                     |
|--------------------------------------|-----------------------------------|
| Aspartate aminotransferase           | Monocyte chemotactic protein-1    |
| Lactic dehydrogenase                 | Interleukin-6                     |
| Alanine aminotransferase             | Tumor necrosis factor-alpha       |
| Alkaline phosphatase                 | Plasminogen activator inhibitor-1 |
| Amylase                              | Resistin                          |
| Total protein                        | Adiponectin                       |
| Glucose                              | Insulin                           |
| Total bilirubin                      | Amylin                            |
| High-density lipoprotein cholesterol | Leptin                            |
| Low-density lipoprotein cholesterol  | Glucagon-like peptide-1           |
| Total cholesterol                    |                                   |
| Triglyceride                         |                                   |
| Hemoglobin A1c                       |                                   |

b

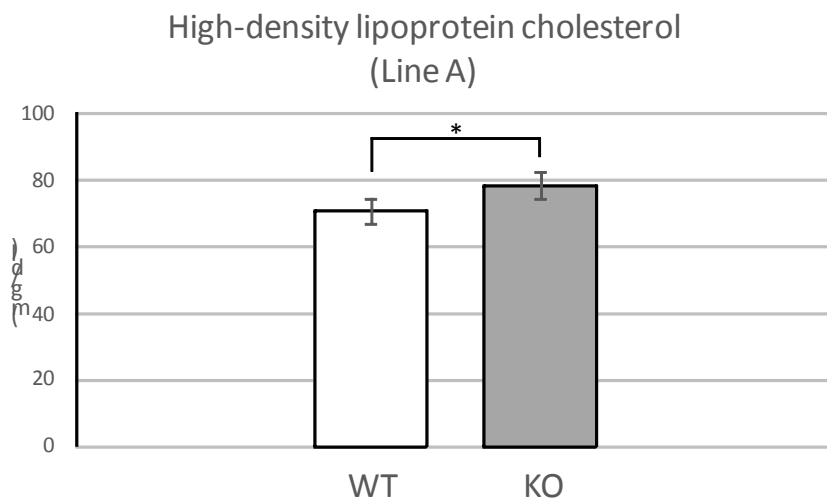

**Figure S5. List of serum biochemical parameters analysed in lines A and D. Only the high-density lipoprotein (HDL) cholesterol level in homozygous KO female mice of line A was significantly higher compared with that of the WT litter-mates ( $*P < 0.05$ ). The data were analysed by two-way ANOVA analysis (sex  $\times$  genotype) followed by Tukey multiple comparisons. Data are presented as the mean  $\pm$  S.E.M.**

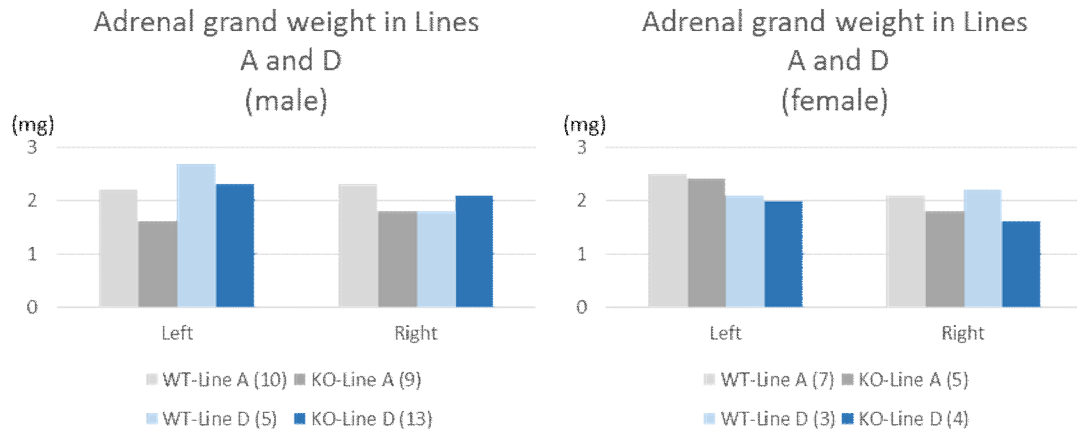

**Figure S6. Adrenal gland weights in KO mouse in lines A and D. There was no genotype-related significance. Data are presented as the mean  $\pm$  S.E.M. The numbers in parentheses indicate the number of animals used for each group.**

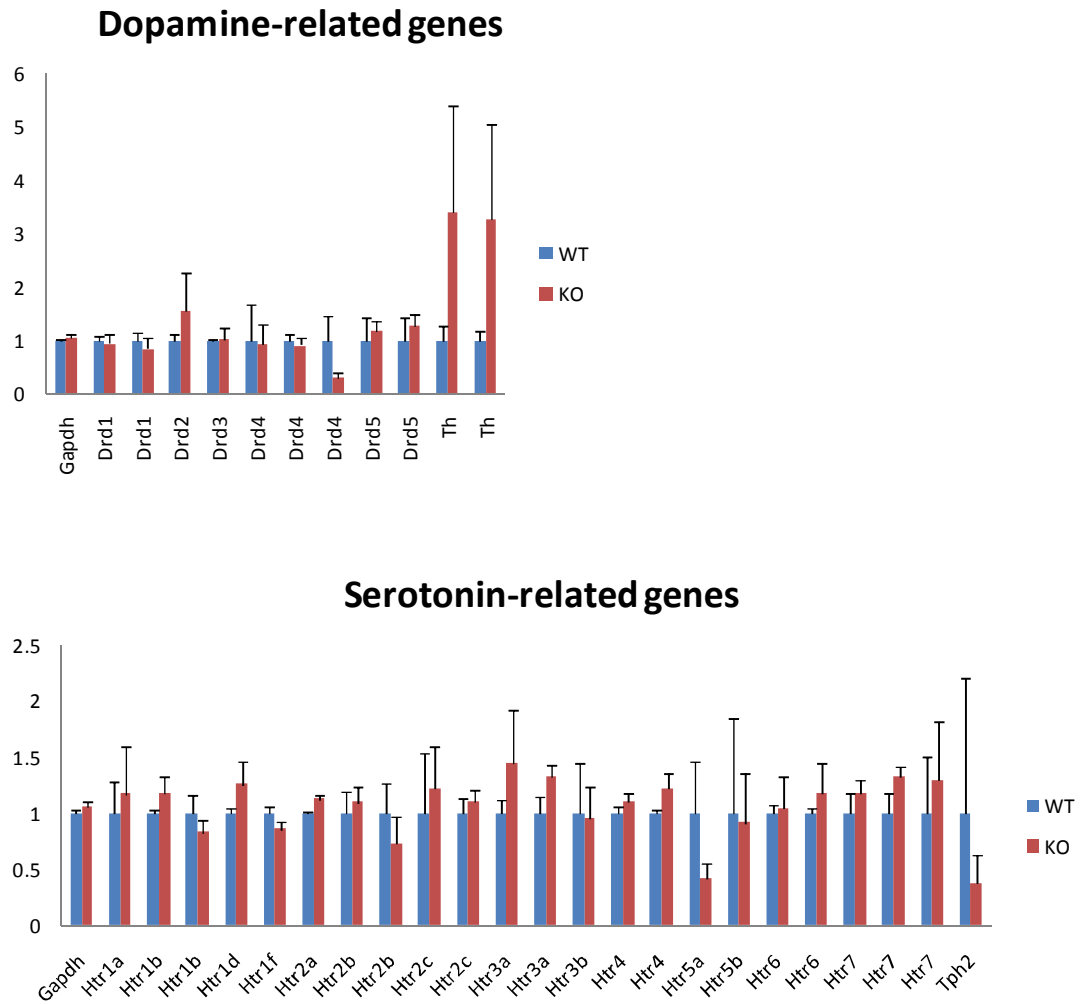

**Figure S7. Microarray data for the expression levels of gene related to neurotransmitters in the midbrain. Data are presented as the mean ± S.D. WT: n = 2, KO: n = 6.**



**Supplementary Movie S1. A WT mouse during the stay-on-hand test. It stayed on the experimenter's hand for less than 1 s.**

**Supplementary Movie S2. A nonagouti homozygous KO mouse during the stay-on-hand test. It stayed on the experimenter's hand for a longer time than did the WT mice.**

**Table S4. Potential off target sequences**

| GCAGAAAAGAAGCCGAGAAG (CRISPR#2)        |       |            | Gene Symbol | Gene Name                                       |
|----------------------------------------|-------|------------|-------------|-------------------------------------------------|
| GCAGAAAAGAAG <b>gg</b> GAGAAG          | chr.1 | intergenic |             |                                                 |
| GCAGAA <b>g</b> AGAgGCCGAGAA <b>t</b>  | chr.3 | intergenic |             |                                                 |
| GCAGAAAAG <b>t</b> AGC <b>a</b> GAGAAG | chr.4 | intergenic |             |                                                 |
| GCAGAAAAGAAGC <b>a</b> GAGAAG          | chr.6 | intergenic |             |                                                 |
| GCAGAA <b>g</b> GAAGC <b>t</b> GAGAAG  | chr.7 | genic      | Dlg2        | discs, large homolog 2 (Drosophila)             |
| GCAGAAAAGAAGC <b>a</b> GAGAAG          | chr.7 | intergenic |             |                                                 |
| GCAGAAAAGAAG <b>aa</b> GAGAAG          | chr.8 | intergenic |             |                                                 |
| <b>c</b> CAGAAAAGAA <b>t</b> CCGAGAAG  | chr.9 | genic      | Fam219b     | family with sequence similarity 219, member B   |
| GCAGAAAAGAAGC <b>t</b> GAGAAG          | chr12 | genic      | Kcnk13      | potassium channel, subfamily K, member 13       |
| GCAGAAAAG <b>g</b> AGC <b>t</b> GAGAAG | chr13 | genic      | Fars2       | phenylalanine-tRNA synthetase 2 (mitochondrial) |
| <b>Gg</b> AGAAAAGAAGCCGAGAAG           | chr18 | intergenic |             |                                                 |

Mismatches from the on-target sequence are indicated by bolded lowercase letters.

| GAAAAAGGCTTCGATGAAGA (CRISPR#3) |       |            | Gene Symbol | Gene Name                                            |
|---------------------------------|-------|------------|-------------|------------------------------------------------------|
| GAAAAAGGCTTCGATG <b>gt</b> GA   | chr.5 | intergenic |             |                                                      |
| GAAAAAGGCT <b>g</b> CGATGAAGA   | chr.X | genic      | Itih5l-ps   | inter-alpha (globulin) inhibitor H5-like, pseudogene |

Mismatches from the on-target sequence are indicated by bolded lowercase letters.

**Table S5. Primer sets used for PCR in this study.**

| Name                     | Forward (5' to 3')           | Reverse (5' to 3')             |
|--------------------------|------------------------------|--------------------------------|
| sgRNA of CRISPR1         | caccGAGTCACTTGTGCTGTAAGT     | aaacACTTACAGCACAAGTGACTC       |
| sgRNA of CRISPR2         | caccGCAGAAAAGAAGCCGAGAAG     | aaacCTTCTCGGCTTCTTTTCTGC       |
| sgRNA of CRISPR3         | caccGAAAAAGGCTTCGATGAAGA     | aaacTCTTCATCGAAGCCTTTTTC       |
| pCAG-EGxxFP/for CRISPR1* | ttgaattCATCCTCCCCTAACCTCCAT  | ttggatccAGCAGCAAGCAGGAGAGAAG   |
| pCAG-EGxxFP/for CRISPR2* | ttgaattcGCCAGGCTAATCAGAACCTG | ttggatccTGACCAATTTTCAGGAATGCTT |
| pCAG-EGxxFP/for CRISPR3* | ttgaattCAGTACATGAGCATCGCAGG  | ttggatccTCCTCGGCAGCCTAAAAATA   |
| Mutant allele A          | CTCAGGATGGATGTCACCCG         | TCCGCTTCTCGGCTTCTTTTC          |
| Mutant allele D**        | AGTCCTCAACGTCTCTCCTACA       | GGTGGCTTGCAGCTGTCTG            |
| hCas9                    | CCGAAGAGGTCGTGAAGAAG         | TCGCTTTCCAGCTTAGGGTA           |
| Slc6a3                   | CTGAAGTCTGACGCTGGAGG         | TGGTCAGCTGCACTCCATTC           |
| Slc6a3promoter_ChIP      | GGGAAGAGTGCCTGAGCAA          | TCCCTGAACAACCAACCTGC           |
| Slc6a3gene body_ChIP     | TCCCTGAACAACCAACCTGC         | CAGGCTGAAGTAGAGCAGAACA         |

\*These primers were used for the construction of pCAG-EGxxFP vectors and the genotyping of the offspring.

\*\*The mutation was identified by the length of the PCR product.
